# Supplementary material for: A novel coral-like porous SnO2hollow architecture: biomimetic swallowing growth mechanism and enhanced photovoltaic property for dye-sensitized solar cell application
Source: Royal Society of Chemistry journal article supplement (doi:10.1039/b915650j), 2009-11-16
Supplement: b915650j.pdf [file b915650j.pdf]

## Electronic Supplementary Information (ESI)

### Experimental details

#### *Preparation of coral-like porous SnO<sub>2</sub> hollow architectures*

All chemicals were analytical grade and used without further purification as purchased from Shanghai Chemical Reagents Company. In a typical procedure, 10 mmol SnCl<sub>4</sub>·5H<sub>2</sub>O and 20 mmol sucrose were dissolved into a given amount of distilled water to form a homogeneous solution by constant strong stirring. And then, the mixture was transferred into a Teflon-lined stainless steel autoclave with a capacity of 50 mL. The autoclave was sealed and kept in an oven at a constant temperature of 170 °C for 6 h. Subsequently, the autoclave was taken out and allowed to cool to room temperature naturally. The precipitate was collected by centrifugation and washed for several times with ethanol and deionized water alternately, and dried under vacuum. Finally, the as-obtained powders were annealed in a furnace at 500 °C for 1 h in air, and kept for further use.

#### *Fabrication of dye-sensitized solar cell (DSC) and photovoltaic property investigation*

The structure of DSC is shown in Fig. S1. DSC is composed of transparent conductive layered glasses, SnO<sub>2</sub> architectures covered with dye molecules, and I<sup>-</sup>/I<sub>3</sub><sup>-</sup> redox electrolytes in organic solvents. The size of DSC is 5.0 × 5.0 mm<sup>2</sup>. Cis- di(thiocyanato)-N,N-bis(2,2'-bipyridyl-4,4'-dicarboxylate) Ru(II) bis-tetrabutylammonium (N719) is served as dye sensitizer. I-V characteristics of the as-fabricated DSC, including open-circuit voltage ( $V_{oc}$ ), short-circuit photocurrent ( $J_{sc}$ ), fill factor (FF), and solar energy conversion efficiency ( $\eta$ ), are recorded on a Keithley 2400 source meter under a Xenon lamp (1000 W m<sup>-2</sup>, Changchun Institute of Optics Fine Mechanics and Physics, Chinese Academy of Sciences) which has been calibrated by standard crystalline silicon solar cell.

## Figures

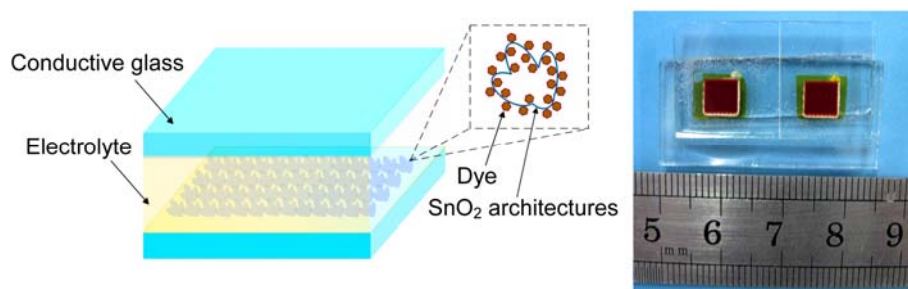

**Fig. S1** Structure of the dye-sensitized solar cell based on coral-like porous SnO<sub>2</sub> hollow architectures

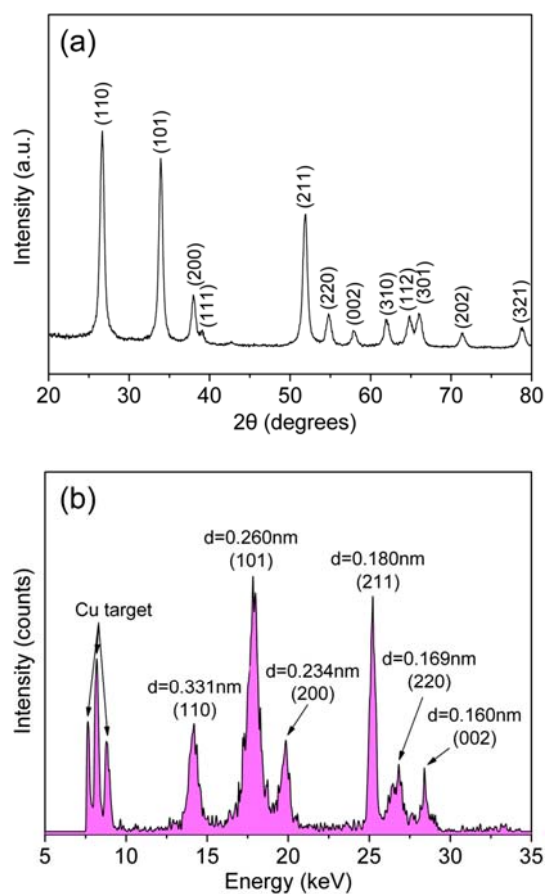

**Fig. S2** (a) X-ray diffraction and (b) energy-dispersive X-ray diffraction patterns of the as-prepared products.

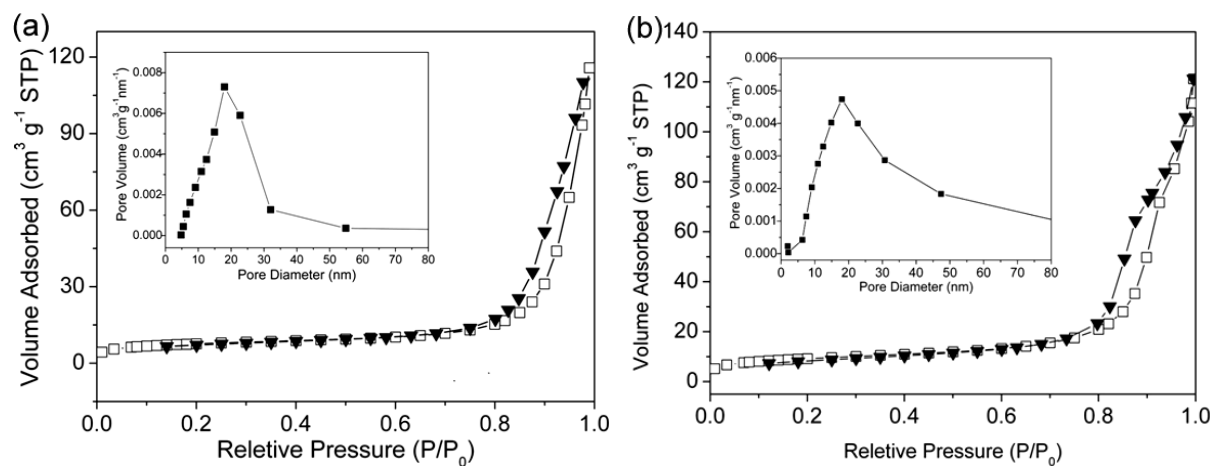

**Fig. S3** Typical N<sub>2</sub> gas adsorption and desorption isotherms of (a) coral-like and (b) spherical porous SnO<sub>2</sub> hollow architectures.

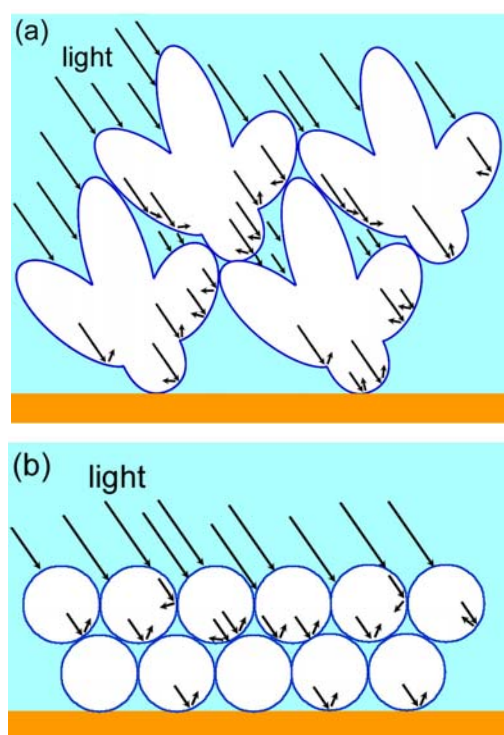

**Fig. S4** Schematic illustration of light absorption in dye-sensitized solar cells based on (a) coral-like SnO<sub>2</sub> architectures and (b) spherical SnO<sub>2</sub> materials.
